# Supplementary material for: Genotype I of Japanese Encephalitis Virus Virus-like Particles Elicit Sterilizing Immunity against Genotype I and III Viral Challenge in Swine
Source: PubMed Central journal article supplement (PMC5945781; doi:10.1038/s41598-018-25596-1), 2018-05-10
Supplement: 41598_2018_25596_MOESM1_ESM.pdf [file 41598_2018_25596_MOESM1_ESM.pdf]

1 **Supplementary Information**

2

3 **Genotype I of Japanese Encephalitis Virus Virus-like Particles Elicit**  
4 **Sterilizing Immunity against Genotype I and III Viral Challenge in**  
5 **Swine**

6 Yi-Chin Fan, Jo-Mei Chen, Jen-Wei Lin, Yi-Ying Chen, Guan-Hong Wu, Kuan-Hsuan  
7 Su, Ming-Tang Chiou, Shang-Rung Wu, Ji-Hang Yin, Jiunn-Wang Liao, Gwong-Jen J.  
8 Chang & Shyan-Song Chiou

9

10 **Protein expression and secretion of GI JEV VLP-expressing plasmids.** VLP is a by-  
11 product secreted from JEV infected cells, and is secreted from cells transfected with the  
12 plasmid encoding viral premembrane (prM) and envelope (E) genes of GIII JEV<sup>1</sup>. Thus,  
13 we constructed a GI JEV VLP-expressing plasmid encoding prM and E genes of GI  
14 JEV, namely pVJGI YL2009-4 WT (Supplementary Fig. 1A), and plasmid-transfected  
15 COS-1 cells were analyzed by indirect immunofluorescence assay (IFA) using mouse  
16 anti-JEV hyperimmune ascitic fluid (HIAF). The signal of VLP antigens were observed  
17 in the pVJGI YL2009-4 WT-transfected cells but not in pVAX control-transfected cells  
18 (Supplementary Fig. 1B). After establishing a cell clone that continually expressed GI  
19 VLP, we constructed another GI VLP-expressing plasmid carrying the neomycin

20 resistance gene named pcDNAJGI YL2009-4 WT, which was derived from pVJGI  
21 YL2009-4 WT (Supplementary Fig. 1C). We measured the VLP antigens being  
22 expressed and the secretion of pcDNAJGI YL2009-4 WT in heparan sulfate-deficient  
23 CHO-pgsA745 cells (CHO-HS(-)), which are low susceptible to JEV infection<sup>2</sup>. The  
24 positive signal of VLP antigens was shown in the pcDNAJGI YL2009-4 WT-  
25 transfected CHO-HS(-) cells (Supplementary Fig. 1D). Then, we harvested VLP  
26 antigens from the day-old culture media of the plasmid-transfected COS-1 and CHO-  
27 HS(-) cells, and the end-point VLP titer was determined by the antigen-capture ELISA  
28 (Ag-ELISA) with titers in the range of 38 to 75 and 30 to 58, respectively. We compared  
29 and examined the viral proteins expressed by COS-1 and CHO-HS(-) cells-derived VLP  
30 and JEV-infected culture supernatants by electrophoresis and Western blotting. The  
31 viral E, NS1, prM, and M proteins were detectable in JEV sample, and the same size of  
32 E and prM proteins were in the VLPs secreted from either COS-1 or CHO-HS(-) cells  
33 (Supplementary Fig. 1E). These results indicated VLPs were successfully translated  
34 and secreted from pVJGI YL2009-4 WT- and pcDNAJGI YL2009-4 WT-transfected  
35 cells.

36

37 **Establishment of the CHO-HS(-) clone to consistently produce GI JEV VLPs.** The  
38 use of transiently transfected cells to produce a VLP vaccine requires purified plasmids

39 and a cumbersome process to separate dead and non-antigen producing cells. We  
40 selected and established a VLP-expressing CHO-HS(-) cell line, which might reduce  
41 the re-attachment of the secreted VLPs on the heparan sulfate-deficient cell surface<sup>2</sup>.  
42 Thus, VLPs expressed in this cell line may reduce the cell fusion and improve the  
43 production of GI JEV VLPs. The pcDNAJGI YL2009-4 WT-transfected and non-  
44 transfected CHO-HS(-) cells were cultured with G418, and cell viability was recorded  
45 under light microscopy at 0, 5, and 12 days post-treatment (DPT) (Supplementary Fig.  
46 S3). The non-transfected CHO-HS(-) cells became rounded and detached from the flask  
47 at 5 DPT, with complete cell death at 12 DPT. However, a portion of pcDNAJGI  
48 YL2009-4 WT-transformed cells survived at 12 DPT (Supplementary Fig. S3). The  
49 G418 resistant GI plasmid-transformed cells were sub-cloned twice using the limited  
50 dilution method in 96-well plates, and cell clones secreted VLP antigens were detected  
51 by Ag-ELISA. Ten VLP-positive clones secreted VLPs with the Ag-ELISA titers  $\geq 128$ .  
52 Five 100% IFA positive cell clones (4-4, 51-2, 51-3, 51-6, and 51-10). The 4-4, 51-6,  
53 and 51-10 were selected to determine the stability of VLP secretion (Supplementary  
54 Fig. S4A).

55 The dynamic yield of VLP antigens secreted from the selected clones were  
56 estimated every day for 6 days (Supplementary Fig. S4B). The VLPs were detectable  
57 at day 1, reached a plateau at day 3 and decreased after day 4. The 51-6 and 51-10

58 clones produced a higher amount of VLP, 702.7 and 968.9 ng/ml, respectively. Then,  
59 we evaluated the stability of VLP expression by three clones by passaging cells every  
60 three days for 10 passages. The 51-6 and 51-10 clones constantly secreted VLP antigens  
61 for 10 passages, with an average of 475.1 and 820.4 ng/ml. In contrast, the VLP yield  
62 in 4-4 clone was reduced after the 5th passage (Supplementary Fig. S4C).  
63 Immunofluorescent assay results showed 100% maintenance of VLP-positive cells of  
64 51-6 and 51-10 clones but only half the positive cells of the 4-4 clone at passage 10  
65 (Supplementary Fig. S4D). The 51-10 clone was selected, because of its better stability  
66 and efficiency in secreting VLPs to produce GI JEV VLP for the following study.

67

68

## 69 **Supplementary Methods**

70 **Construction of GI JEV VLP-expressing plasmids.** pVJGI YL2009-4 WT and  
71 pcDNAJGI YL2009-4 WT were GI JEV VLP-expressing plasmids used in the study  
72 and encoded genes in order as human cytomegalovirus early gene promoter (CMV IE),  
73 kozak sequence (5'-GCCGCCGCC-3'), the modified JE signal sequence (5'-  
74 ATGGGCAAGAGGTCCGCCGGCTCAATCATGTGGCTCGCGAGCTTGGCAGTT  
75 GTCATAGCTGGTACAAGCGCT-3'), prM (nucleotide position 478 to 978 in the  
76 genome of GI YL2009-4 strain), 80% E genes (nucleotide position 979 to 2175 in the  
77 genome of GI YL2009-4 strain) and 20% E genes (nucleotide position 2175 to 2477 in  
78 the genome of GIII SA14 strain, KU323483.1) with chimeric human  $\beta$ -globin gene  
79 intron (5'-  
80 GTAAGTATCAAGGTTACAAGACAGGTTTAAGGAGACCAATAGAACTGG  
81 GCTTGTCGAGACAGAGAAGACTCTTGCGTTTCTGATAGGCACCTATTGGTC  
82 TTAAGTATCAAGGTTACAAGACAGGTTTAAGGAGACCAATAGAACTGG-3'), and bovine growth  
83 hormone poly(A) signal. First, the pVJGI YL2009-4 WT was constructed by replacing  
84 prM and 80% E genes of the dengue serotype I virus (DENV1) VLP-expressing plasmid  
85 (pV8D1-2J-i)<sup>5</sup> with the corresponding region of GI YL2009-4 strain in the reaction of  
86 In-Fusion PCR cloning kit (Clontech, USA). Briefly, prM and 80% E genes of GI  
87 YL2009-4 strain were amplified from viral cDNA with the forward (5'-

88 ATAGCTGGTACAAGCGCTATGAAGCTATCAAACCTTTCAAGG-3') and the  
89 reverse (5'-  
90 GCCTTGCCCAGCGTGCTTCCAGCTTTGTGCCAGTGATGGTTAATC-3')

91 primers in PCR reaction of Q5® High-Fidelity 2X Master Mix (New England Biolabs,  
92 USA). The remaining sequences of pVJGI YL2009-4 WT were amplified from pV8D1-  
93 2J-i with the forward (5' GGAAGCACGCTGGGCAAGGC-3') and reverse primers  
94 (5'- AGCGCTTGTACCAGCTATGAC-3'). The two PCR products were annealed in  
95 the reaction of In-Fusion PCR cloning kit following the manufacturers protocols. The  
96 final product of the cloning kit was transformed into competent cells, and it recovered  
97 the pVJGI YL2009-4 WT clone. Then, the modified JE signal sequence, prM, and E  
98 genes of pVJGI YL2009-4 WT were transferred to pcDNA3.1 with KpnI and NotI  
99 restriction enzymes to recover the pcDNAJGI YL2009-4 WT carrying the Neomycin  
100 resistant gene.

101

102 **Selection of the stable cell line secreting GI JEV VLP.** GI JEV VLPs were produced  
103 from the stable clone transformed with the pcDNAJGI YL2009-4 WT plasmid. The  
104 pcDNAJGI YL2009-4 WT plasmid was transfected into CHO-HS(-) cells by using  
105 lipofectamine 2000 (Invitrogen) following the manufacturers protocols. The next day,  
106 the culture media was replaced with F12 medium supplemented with 10% heat-

107 inactivated FBS and 500 µg Geneticin (G418, ThermoFisher) in 1 ml and incubated in  
108 the 37°C incubator until observing death of 90% of cells among the non-transfected  
109 CHO-HS(-) cells. After G418 treatment, surviving cells among the pcDNAJGI  
110 YL2009-4 WT-transformed CHO-HS(-) cells underwent limiting dilution twice. The  
111 single and stable clone was evaluated with the ability and stability of VLP secretion by  
112 the yield of VLP and maintenance of JEV-antigen positive cells after ten passages of  
113 the clone.

114

115 **Indirect immunofluorescence assay (IFA).** Cells transformed with VLP-expressing  
116 plasmids or control vectors were seeded on Millicell EZ SLIDE 8-well glass plates  
117 (Merck Millipore). The next day, the transformed cells were fixed with 4%  
118 paraformaldehyde (Sigma-Aldrich) in PBS (AppliChem Panreac), permeated with  
119 0.05% TritonX 100 (Sigma-Aldrich) in PBS, and then blocked with 5% skimmed milk  
120 in PBS. After blocking, the cells expressing JEV antigens were detected with mouse  
121 anti-JEV HIAF followed by the addition of anti-mouse IgG (H+L) antibodies  
122 conjugated with Alex488 (KPL, Gaithersburg, MD). The cell nucleus was located by  
123 staining with DAPI (Invitrogen). Images were viewed and recorded by fluorescence  
124 microscopy using OLYMPUS CKX41.

125

126 **Histopathology.** The brain specimens were harvested from JEV challenged pigs and  
127 fixed with 10% of formalin (Fisher Scientific). The fixed brain samples were trimmed  
128 and embedded in paraffin. Then, the paraffin sample block was cut into 2  $\mu\text{m}$  thickness  
129 and stained by hematoxylin and eosin (H&E). The histopathological change was  
130 observed and recorded by a light microscopy (BX-51, Olympus Tokyo, Japan).

131



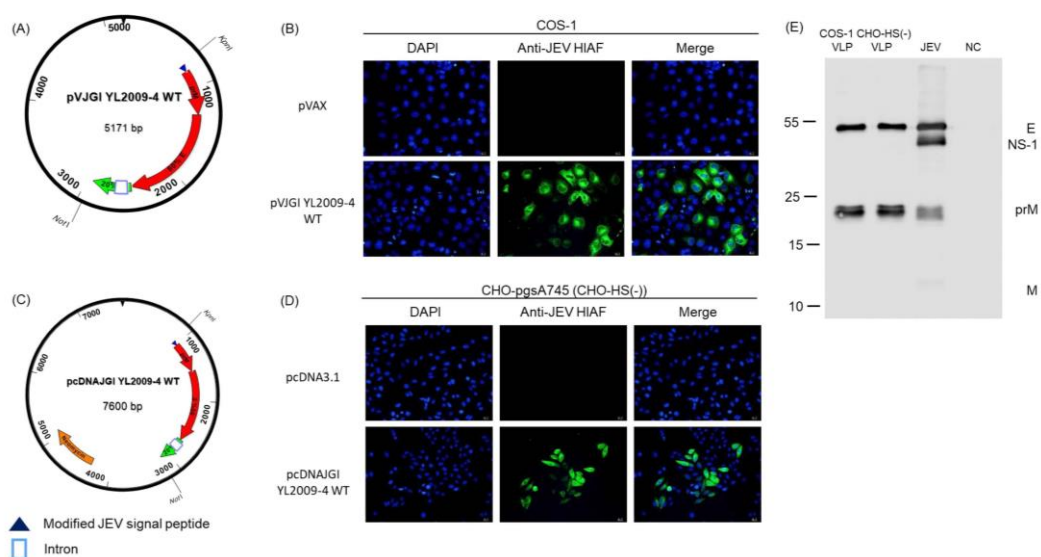

133

#### 134 **Supplementary Figure S1. Characterization of GI JEV VLP-expressing plasmids.**

135 The prM and 80% of E gene (ectodomain region) encoded by GI JEV YL2009-4, and  
 136 20% of the E gene (transmembrane region) of the GIII SA-14 strain<sup>3</sup> were incorporated  
 137 into pVAX and pcDNA3.1 vectors to establish the plasmids expressing GI JEV VLP,  
 138 called pVJGI YL2009-4 WT (A) and pcDNAJGI YL2009-4 WT (C). The modified JE  
 139 signal peptide sequence was located in front of the prM gene, and the intron was  
 140 inserted within the end of the 20% E gene<sup>4</sup>. The GI VLP antigen was detected in pVJGI  
 141 YL2009-4 WT-transformed COS-1 cells (B) and pcDNAJGI YL2009-4 WT-  
 142 transformed CHO-pgsA745 (CHO-HS(-)) cells (D) by IFA with mouse anti-JEV  
 143 hyperimmune acetic fluid (anti-JEV HIAF) staining. The pVAX- and pcDNA3.1-

144 transfected cells were a negative control (NC). (E) The secreted VLP antigens were  
145 harvested and analyzed by Western blot assay stained with anti-JEV HIAF antibody. GI  
146 JEV VLP antigens collected from the supernatant of transfected COS-1 or CHO-HS(-)  
147 cells are indicated as COS-1 VLP or CHO-HS(-) VLP. The supernatant collected from  
148 GI JE YL2009-4 virus-infected or vector-transfected cells are presented as JEV or NC.  
149 Full-length Western blots are presented in Supplementary Fig. S2.

150

151 **Supplementary Figure S2. Full-length Western blots for Supplementary Figure**

152 **1E and Figure 1B.**

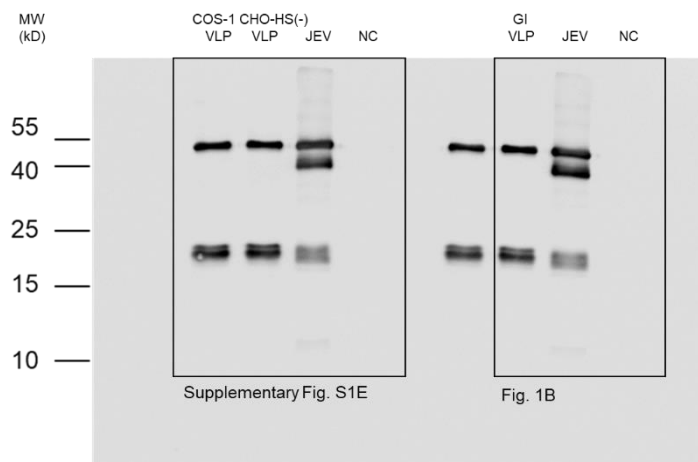

153

154

155

156

157

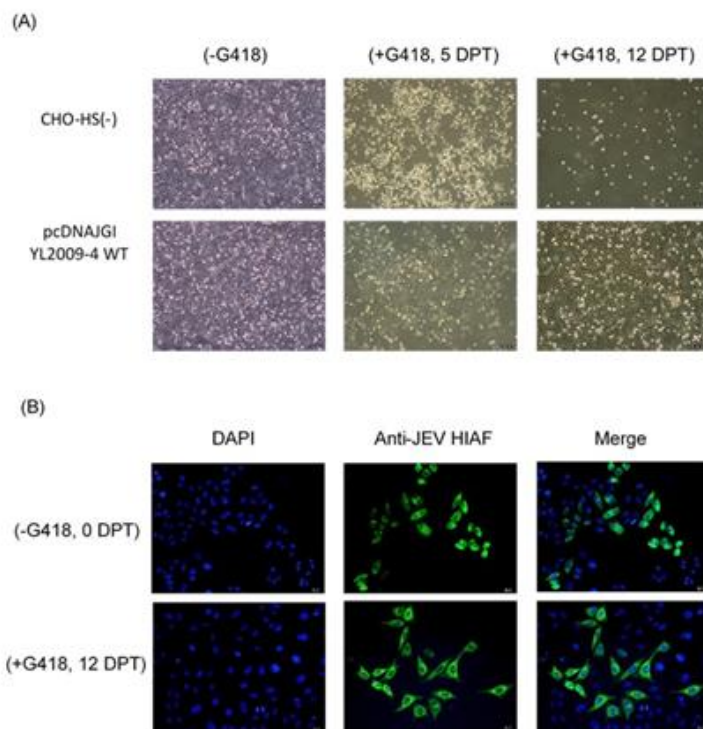

158

159

160 **Supplementary Figure S3. G418 selection of the CHO-HS(-) cell-derived stable**

161 **clones expressing GI JEV VLP.** (A) The viability of pcDNAJGI YL2009-4 WT-

162 transformed or non-transformed CHO-HS(-) cells was recorded at day 1, 5, and 12 post-

163 G418 treatment by light microscopy. (B) Before the limiting dilution, JE signals were

164 detected in plasmid-transformed cells that were untreated (-G418, 0 DPT) or treated

165 (+G418, 12 DPT) with G418 by IFA.

(A)

| Clones <sup>a</sup> | VLP secretion <sup>b</sup> | Positive cells <sup>c</sup> (%) |
|---------------------|----------------------------|---------------------------------|
| 4-1                 | 16                         | 93                              |
| 4-4                 | 64                         | 100                             |
| 4-6                 | 16                         | 96                              |
| 51-2                | 128                        | 100                             |
| 51-3                | 128                        | 100                             |
| 51-6                | 128                        | 100                             |
| 51-10               | 256                        | 100                             |
| 53-1                | 128                        | 69                              |
| 53-2                | 128                        | 64                              |
| 53-5                | 64                         | 58                              |
| 53-6                | 128                        | 75                              |
| 53-12               | 128                        | 91                              |
| 62-7                | 128                        | 57                              |
| 62-9                | 128                        | 54                              |
| 62-12               | 16                         | 20                              |

<sup>a</sup> Clones were selected after G418 treatment followed by the limiting dilution  
<sup>b</sup> VLP secretion was indicated as the endpoint titer of Ag-ELISA  
<sup>c</sup> Positive cells expressing JEV antigens were calculated in IFA

(B)

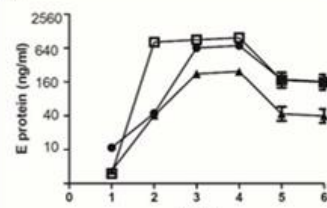

(C)

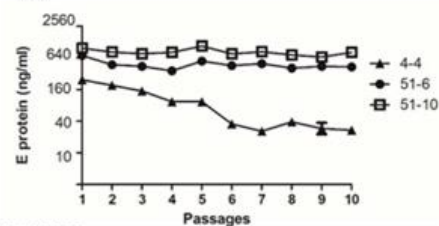

(D)

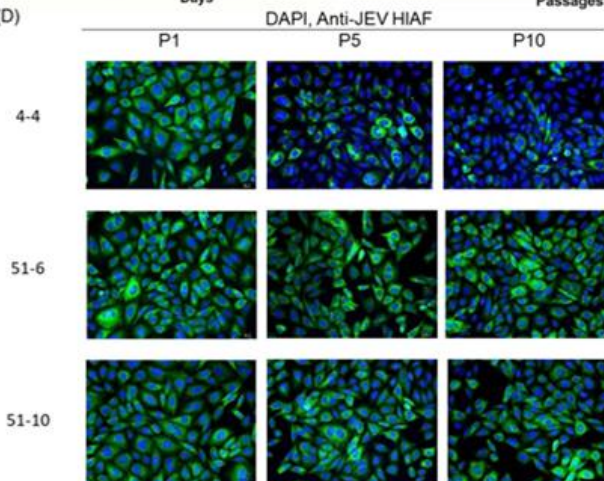

167

168 **Supplementary Figure S4. Establishment of the GI VLP-expressing CHO-HS(-)**

169 **stable clones.** (A) After incubation with G418 for 12 days, surviving pcDNAJGI

170 YL2009-4 WT-transformed CHO-HS(-) cells were limiting diluted and cultured twice.

171 The single clone was selected and VLP secretion was measured by Ag-ELISA and JEV-

172 positive rate by IFA. (B) The dynamic yield of VLP antigens secreted from the selected

173 4-4, 51-6, and 51-10 clones was estimated every day for 6 days. (C) The stability of 4-

174 4, 51-6, and 51-10 clones on VLP expression was evaluated by passaging every 3 days

175 for 10 passages. The yield was estimated by Ag-ELISA by using the standard of purified

176 GI VLP and presented as the concentration of E protein (nanograms per ml). (D) The

177 positive rate of JEV signal was determined among the 4-4, 51-6, and 51-10 clones at  
178 passage 1 (P1), 5 (P5), and 10 (P10) by IFA.

179

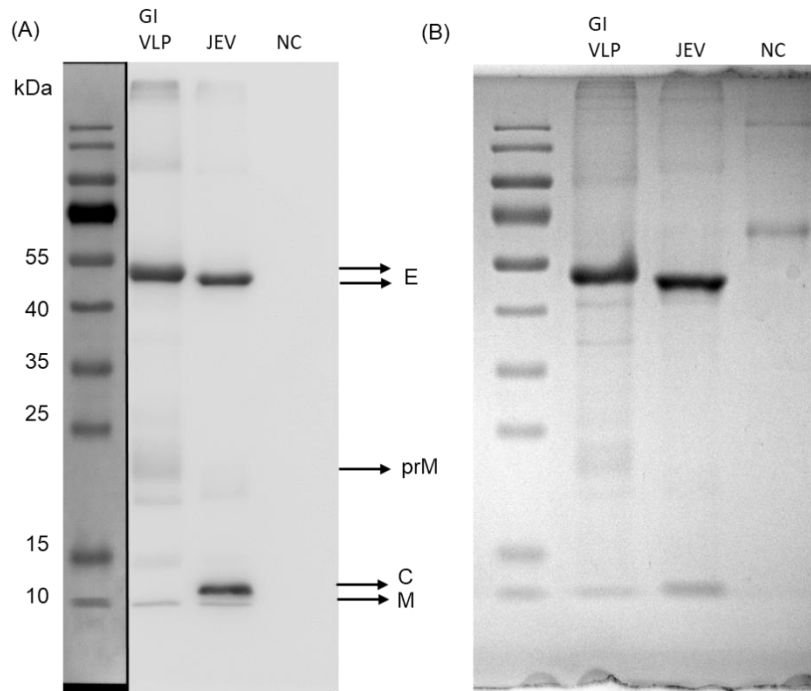

180

181 **Supplementary Figure S5.** The CHO-HS(-) derived 51-10 clone-produced and  
182 purified GI JEV VLP sample was analyzed by Western blot assay (A) with anti-JEV  
183 HIAF and is indicated as GI VLPs. Total protein of the GI JEV VLP-purified sample  
184 was examined in Coomassie blue-stained SDS page (B). The supernatant collected from  
185 GI JE YL2009-4 virus-infected or the non-infected C6/36 cells (*Aedes albopictus* clone)  
186 is presented as JEV or NC (negative control).

187

188

189

190 **Supplementary Figure S6. Full-length Western blots for Figure 2C**

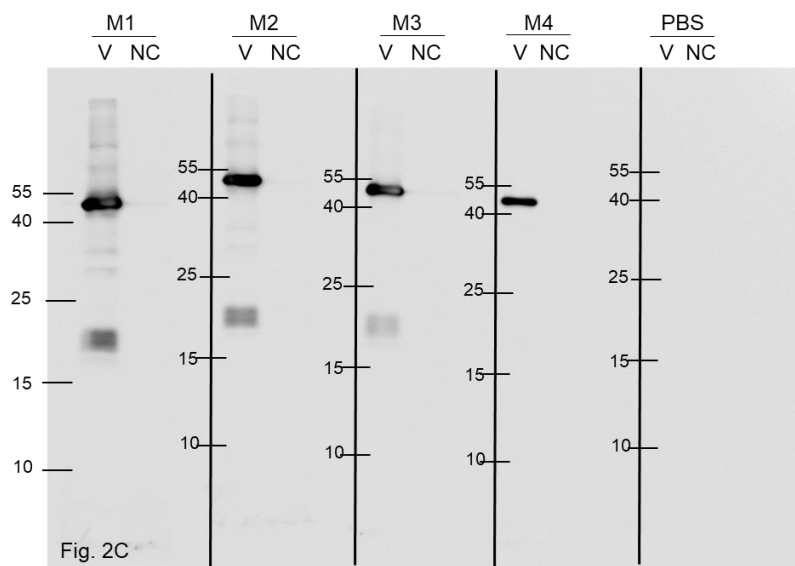

191  
192

193 **Supplementary Figure S7. Full-length Western blots for Figure 3C**

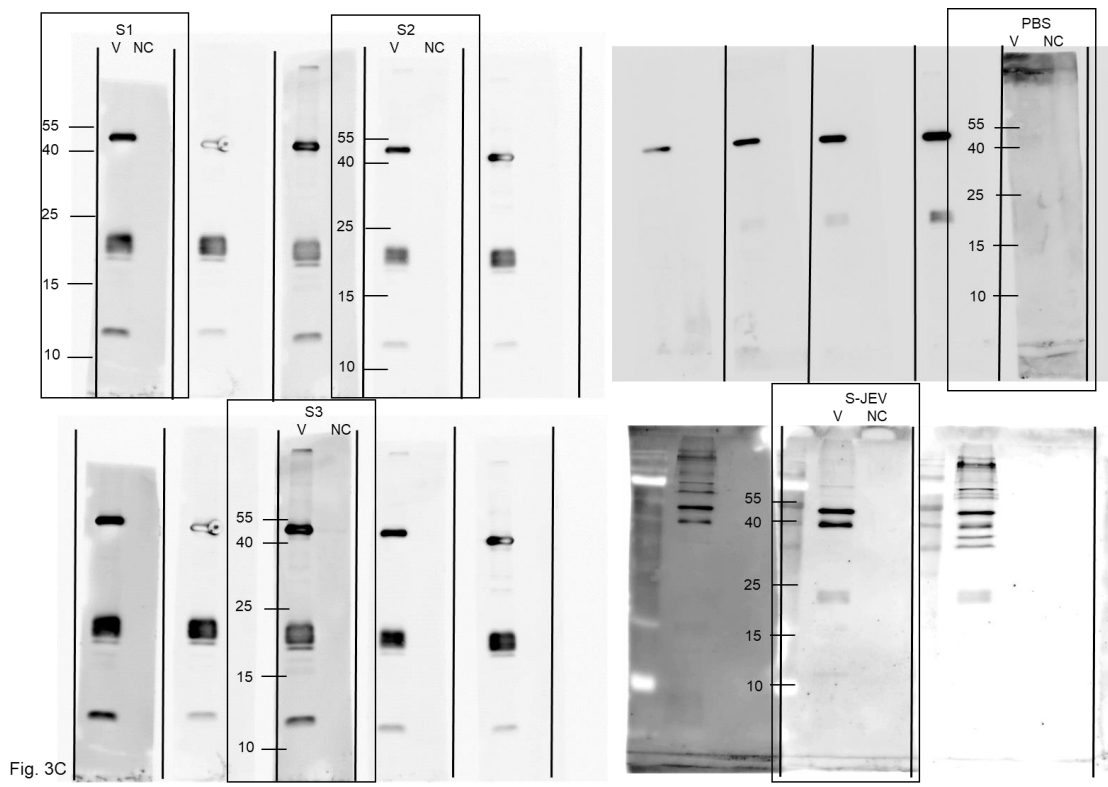

194  
195  
196

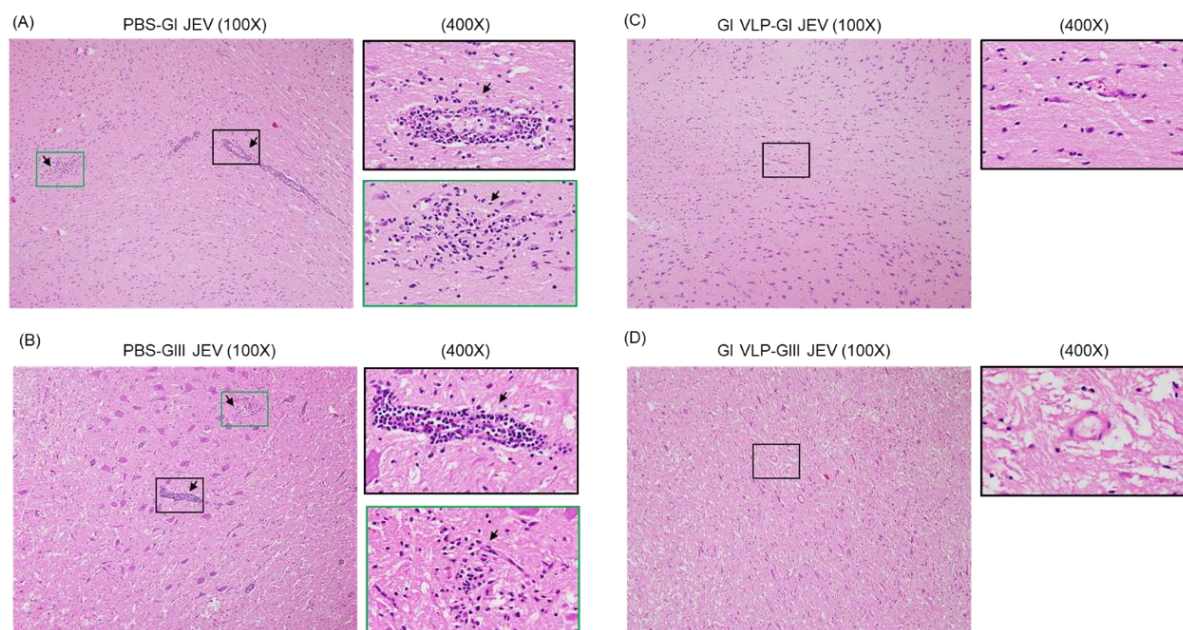

198

199 **Supplementary Figure S8. Histopathological changes of immunized SPF pig brain**

200 **after JEV challenge.** Immunized pigs at age 10 weeks were subcutaneously injected

201 with  $10^7$  ffu JEVs. Brains were harvested from PBS-immunized pigs (A and B) and GI

202 VLP-immunized pigs (C and D) at 8 days after challenge with GI YL2009-4 virus (A

203 and C) or GIII CH1392 virus (B and D). Histology was examined by hematoxylin and

204 eosin staining under low magnification (100X) and high magnification (400X).

205 Multifocal lymphocytic perivascular cuffing and gliosis are indicated with arrows and

206 highlighted with black and green rectangles, respectively.

207

208 **Supplementary References**

- 209 1 Chang, G. J., Hunt, A. R. & Davis, B. A single intramuscular injection of  
210 recombinant plasmid DNA induces protective immunity and prevents Japanese  
211 encephalitis in mice. *Journal of virology* **74**, 4244-4252 (2000).
- 212 2 Chien, Y. J., Chen, W. J., Hsu, W. L. & Chiou, S. S. Bovine lactoferrin inhibits  
213 Japanese encephalitis virus by binding to heparan sulfate and receptor for low  
214 density lipoprotein. *Virology* **379**, 143-151, doi:10.1016/j.virol.2008.06.017  
215 (2008).
- 216 3 Purdy, D. E. & Chang, G. J. Secretion of noninfectious dengue virus-like  
217 particles and identification of amino acids in the stem region involved in  
218 intracellular retention of envelope protein. *Virology* **333**, 239-250,  
219 doi:10.1016/j.virol.2004.12.036 (2005).
- 220 4 Chiou, S. S., Fan, Y. C., Crill, W. D., Chang, R. Y. & Chang, G. J. Mutation  
221 analysis of the cross-reactive epitopes of Japanese encephalitis virus envelope  
222 glycoprotein. *The Journal of general virology* **93**, 1185-1192,  
223 doi:10.1099/vir.0.040238-0 (2012).
- 224 5 Crill, W. D. *et al.* Sculpting humoral immunity through dengue vaccination to  
225 enhance protective immunity. *Frontiers in immunology* **3**, 334,  
226 doi:10.3389/fimmu.2012.00334 (2012).
